# Supplementary figures and images for: Exploring heat and cold wave susceptible areas of India using consistency and frequency coupled novel approach
Source: Research Square preprint supplement (doi:10.21203/rs.3.rs-1749917/v1), 2022-06-17

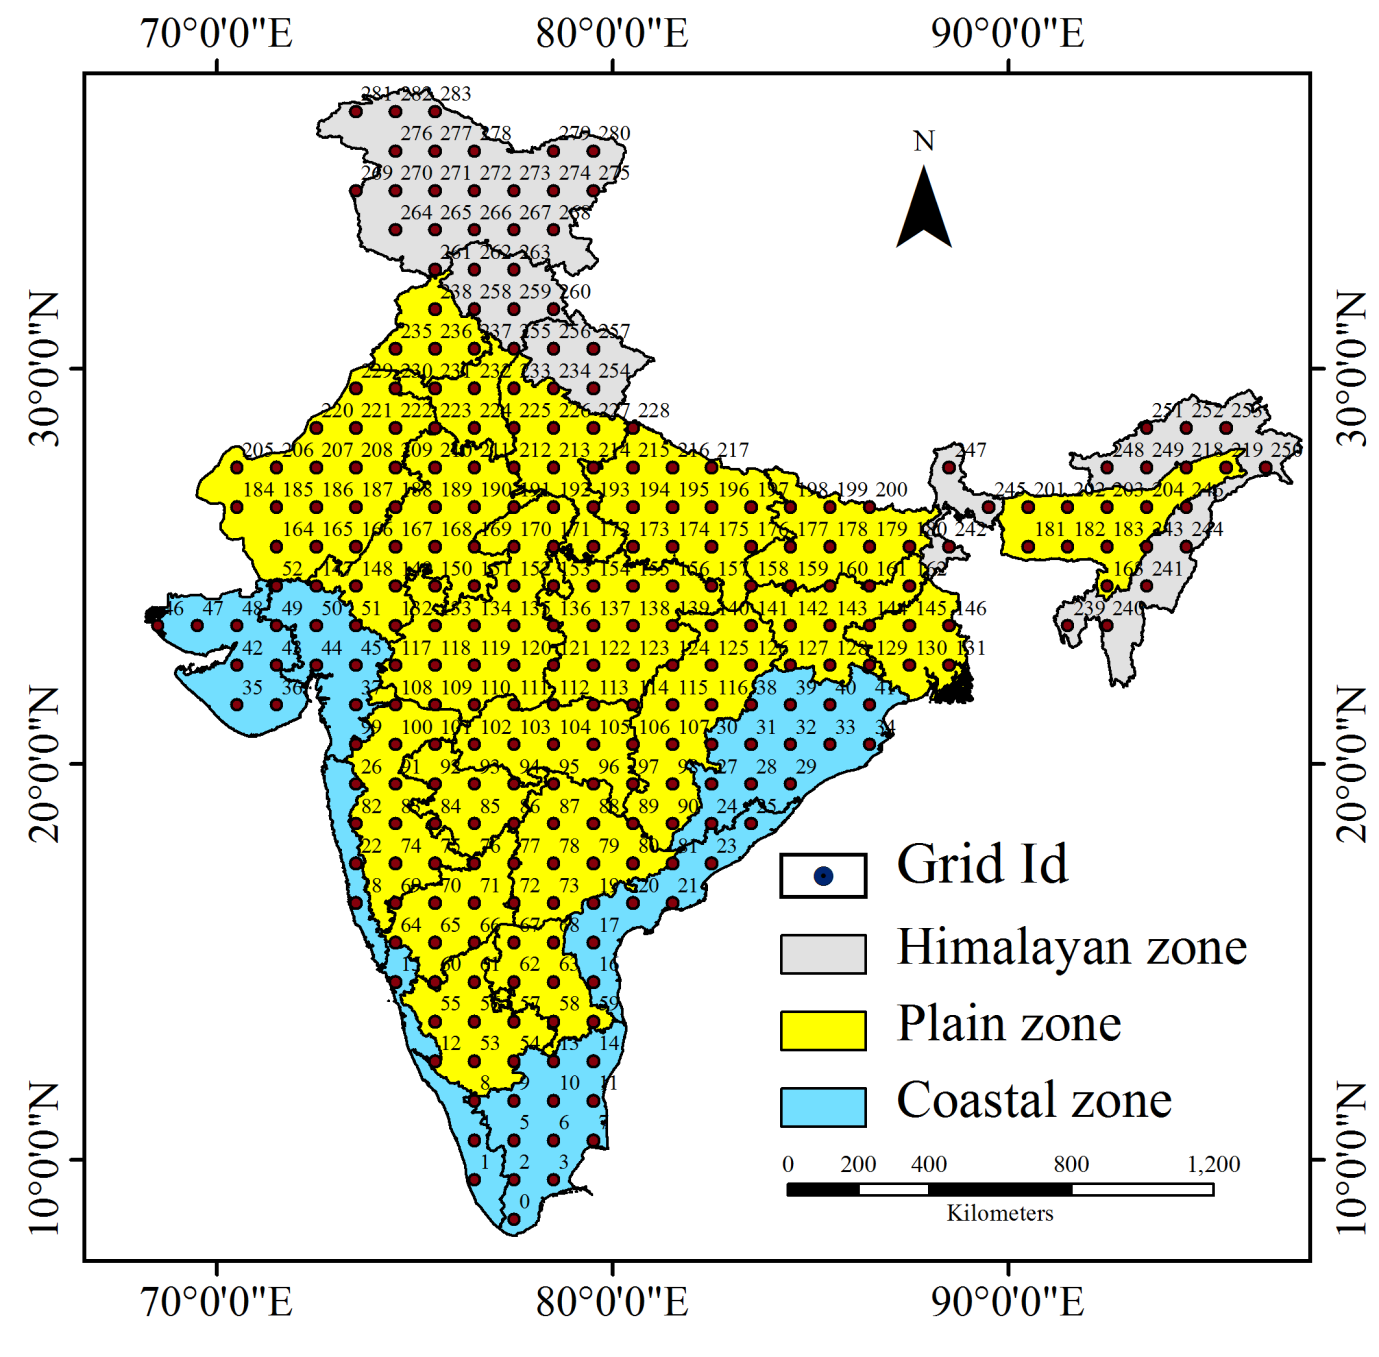


Supplementary Figure S1: Grid id details of Himalayan, Plain, and coastal zones respectively

Supplement: Supplementary file 1 [file 39ff56205e72806de6d0959a.docx]
